# Supplementary material for: Exploring AI-2-mediated interspecies communications within rumen microbial communities
Source: Microbiome. 2022 Oct 7;10:167. doi: 10.1186/s40168-022-01367-z (PMC9540692; doi:10.1186/s40168-022-01367-z)
Supplement: Supplementary file 9 — Additional file 8: Table S5. The diversity of predicted CahR-type receptors. [file 40168_2022_1367_MOESM8_ESM.xlsx]

## Sheet: Additional file 5
The diversity of predicted CahR-type receptors.
Species	Protein name predicted	Protein length	Model prediction					Pfam Domain architecture
			Family	Start	End	Length of predicted domain	i-Evalue
Acetatifactor sp. isolate RUG309	Sensor histidine kinase	1558	dCache_1	329	496	168	1.6e-11	dCache_1~dCache_1~HisKA~HATPase_c~Response_reg~
			dCache_1	723	836	114	1.7e-14
Acetatifactor sp. isolate RUG447	Sensor histidine kinase	886	dCache_1	42	222	181	2.6e-17	dCache_1~HisKA~HATPase_c~Response_reg~Hpt~
Acetitomaculum ruminis DSM 5522	Methyl-accepting chemotaxis protein	658	dCache_1	53	271	219	1.4e-15	dCache_1~MCPsignal~
	Methyl-accepting chemotaxis protein	678	dCache_1	132	281	150	7.2e-09	dCache_1~HAMP~MCPsignal~
Anaerovibrio lipolyticus DSM 3074	Methyl-accepting chemotaxis protein	658	dCache_1	123	263	141	3e-20	dCache_1~HAMP~MCPsignal~
Anaerovibrio lipolyticus LB2005	Methyl-accepting chemotaxis protein	658	dCache_1	123	263	141	7.2e-20	dCache_1~HAMP~MCPsignal~
	Methyl-accepting chemotaxis protein	657	dCache_1	39	229	191	2.1e-12	dCache_1~HAMP~MCPsignal~
Anaerovibrio sp. RM50	Methyl-accepting chemotaxis protein	658	dCache_1	123	263	141	7.2e-20	dCache_1~HAMP~MCPsignal~
	Sensor histidine kinase	928	dCache_1	128	270	143	8.3e-10	dCache_1~HisKA~HATPase_c~Response_reg~Hpt~
	Methyl-accepting chemotaxis protein	651	dCache_1	92	256	165	1e-12	dCache_1~MCPsignal~
Bacillus licheniformis VTM3R78	Methyl-accepting chemotaxis protein	655	dCache_1	36	259	224	5.5e-31	dCache_1~HAMP~MCPsignal~
Bacillus nealsonii AAU1	Methyl-accepting chemotaxis protein	662	dCache_1	46	267	222	2.8e-25	dCache_1~HAMP~MCPsignal~
Bacillus sp. MB2021	Methyl-accepting chemotaxis protein	662	dCache_1	44	267	224	3.7e-21	dCache_1~HAMP~MCPsignal~
Bacteroidaceae bacterium isolate RUG454	Serine phosphatases	642	dCache_1	144	297	154	1e-06	dCache_1~HAMP~SpoIIE~
Bacteroidales bacterium isolate RUG401	Serine phosphatases	633	dCache_1	113	291	179	6.4e-10	dCache_1~HAMP~SpoIIE~
Bacteroidales bacterium isolate RUG481	Serine phosphatases	633	dCache_1	113	291	179	1.8e-09	dCache_1~HAMP~SpoIIE~
Bacteroidales bacterium isolate RUG526	Serine phosphatases	633	dCache_1	113	291	179	2.4e-09	dCache_1~HAMP~SpoIIE~
Butyrivibrio fibrisolvens AB2020	Serine phosphatases	707	dCache_1	160	331	172	9.1e-19	dCache_1~HAMP~SpoIIE~
	Methyl-accepting chemotaxis protein	675	dCache_1	59	279	221	4.2e-12	dCache_1~HAMP~MCPsignal~
Butyrivibrio fibrisolvens AR40	Methyl-accepting chemotaxis protein	675	dCache_1	59	279	221	4.4e-12	dCache_1~HAMP~MCPsignal~
	Serine phosphatases	707	dCache_1	160	331	172	9.1e-19	dCache_1~HAMP~SpoIIE~
Butyrivibrio fibrisolvens DSM 3071	Methyl-accepting chemotaxis protein	678	dCache_1	113	279	167	3.8e-07	dCache_1~HAMP~MCPsignal~
	Serine phosphatases	707	dCache_1	157	331	175	8.3e-20	dCache_1~HAMP~SpoIIE~
Butyrivibrio fibrisolvens FE2007	Methyl-accepting chemotaxis protein	675	dCache_1	59	279	221	3.2e-12	dCache_1~HAMP~MCPsignal~
Butyrivibrio fibrisolvens MD2001	Serine phosphatases	707	dCache_1	160	331	172	4.6e-18	dCache_1~HAMP~SpoIIE~
	Methyl-accepting chemotaxis protein	675	dCache_1	59	279	221	4.4e-12	dCache_1~HAMP~MCPsignal~
Butyrivibrio fibrisolvens ND3005	Methyl-accepting chemotaxis protein	675	dCache_1	59	279	221	4.2e-12	dCache_1~HAMP~MCPsignal~
Butyrivibrio fibrisolvens WTE3004	Serine phosphatases	707	dCache_1	160	331	172	9.1e-19	dCache_1~HAMP~SpoIIE~
	Methyl-accepting chemotaxis protein	675	dCache_1	59	279	221	3.2e-12	dCache_1~HAMP~MCPsignal~
Butyrivibrio fibrisolvens YRB2005	Serine phosphatases	707	dCache_1	160	331	172	1.2e-18	dCache_1~HAMP~SpoIIE~
	Methyl-accepting chemotaxis protein	675	dCache_1	61	279	219	4.8e-12	dCache_1~HAMP~MCPsignal~
Butyrivibrio hungatei NK4A153	Methyl-accepting chemotaxis protein	663	dCache_1	39	269	231	8.8e-22	dCache_1~MCPsignal~
Butyrivibrio proteoclasticus B316	C-di-GMP-cyclases and diesterases	815	dCache_1	340	574	235	3.3e-19	dCache_1~HD~
	C-di-GMP-cyclases and diesterases	624	dCache_1	115	277	163	4.4e-23	dCache_1~GGDEF~
Butyrivibrio proteoclasticus FD2007	C-di-GMP-cyclases and diesterases	815	dCache_1	340	574	235	2.9e-18	dCache_1~HD~
	C-di-GMP-cyclases and diesterases	624	dCache_1	115	277	163	1.2e-21	dCache_1~GGDEF~
Butyrivibrio proteoclasticus P18	Methyl-accepting chemotaxis protein	680	dCache_1	116	283	168	4.2e-07	dCache_1~HAMP~MCPsignal~
	Serine phosphatases	678	dCache_1	146	323	178	2e-18	dCache_1~HAMP~SpoIIE~
Butyrivibrio sp. AC2005	Sensor histidine kinase	1251	dCache_1	35	260	226	2.8e-12	dCache_1~dCache_1~HisKA~HATPase_c~Response_reg~Hpt~
			dCache_1	424	638	215	4e-16
	Sensor histidine kinase	1189	dCache_1	349	578	230	1.8e-17	dCache_1~HisKA~HATPase_c~Response_reg~
	Methyl-accepting chemotaxis protein	683	dCache_1	120	286	167	6.7e-11	dCache_1~HAMP~MCPsignal~
Butyrivibrio sp. AD3002	Sensor histidine kinase	1258	dCache_1	102	220	119	4.9e-09	dCache_1~dCache_1~HisKA~HATPase_c~Response_reg~
			dCache_1	423	608	186	9.9e-19
	Sensor histidine kinase	1190	dCache_1	344	534	191	3.3e-15	dCache_1~HisKA~HATPase_c~Response_reg~
	Methyl-accepting chemotaxis protein	684	dCache_1	121	287	167	7.6e-13	dCache_1~HAMP~MCPsignal~
Butyrivibrio sp. AE2005	Methyl-accepting chemotaxis protein	663	dCache_1	39	269	231	8.8e-22	dCache_1~MCPsignal~
Butyrivibrio sp. AE2015	Methyl-accepting chemotaxis protein	680	dCache_1	116	283	168	4.2e-07	dCache_1~HAMP~MCPsignal~
	Serine phosphatases	678	dCache_1	148	323	176	1.1e-17	dCache_1~HAMP~SpoIIE~
Butyrivibrio sp. AE2032	Sensor histidine kinase	801	dCache_1	50	273	224	2.3e-15	dCache_1~HisKA~HATPase_c~Response_reg~
Butyrivibrio sp. AE3003	Methyl-accepting chemotaxis protein	663	dCache_1	39	269	231	8.8e-22	dCache_1~MCPsignal~
Butyrivibrio sp. AE3004	Sensor histidine kinase	1183	dCache_1	357	578	222	2e-13	dCache_1~HisKA~HATPase_c~Response_reg~
	Methyl-accepting chemotaxis protein	671	dCache_1	108	275	168	9.7e-10	dCache_1~HAMP~MCPsignal~
	Sensor histidine kinase	1241	dCache_1	422	650	229	1.1e-19	dCache_1~dCache_1~HisKA~HATPase_c~Response_reg~
Butyrivibrio sp. AE3009	Methyl-accepting chemotaxis protein	680	dCache_1	116	283	168	1.1e-05	dCache_1~HAMP~MCPsignal~
Butyrivibrio sp. FC2001	Sensor histidine kinase	1253	dCache_1	35	259	225	1.6e-08	dCache_1~dCache_1~HisKA~HATPase_c~Response_reg~Hpt~
			dCache_1	422	650	229	7.2e-16
	Methyl-accepting chemotaxis protein	685	dCache_1	120	287	168	1.5e-09	dCache_1~HAMP~MCPsignal~
Butyrivibrio sp. FCS006	Methyl-accepting chemotaxis protein	688	dCache_1	60	291	232	4.6e-13	dCache_1~HAMP~MCPsignal~
Butyrivibrio sp. FCS014	hypothetical protein	435	dCache_1	47	319	273	1.7e-15	dCache_1~HAMP~
	Methyl-accepting chemotaxis protein	675	dCache_1	113	278	166	5.7e-10	dCache_1~HAMP~MCPsignal~
Butyrivibrio sp. INlla16	Sensor histidine kinase	1258	dCache_1	102	222	121	2.2e-10	dCache_1~dCache_1~HisKA~HATPase_c~Response_reg~
			dCache_1	423	602	180	4.5e-19
	Sensor histidine kinase	1193	dCache_1	344	534	191	2e-15	dCache_1~HisKA~HATPase_c~Response_reg~
	Methyl-accepting chemotaxis protein	655	dCache_1	92	258	167	2.2e-12	dCache_1~HAMP~MCPsignal~
Butyrivibrio sp. isolate RUG292	Methyl-accepting chemotaxis protein	675	dCache_1	59	279	221	1.4e-11	dCache_1~HAMP~MCPsignal~
	Serine phosphatases	707	dCache_1	160	331	172	1.1e-17	dCache_1~HAMP~SpoIIE~
Butyrivibrio sp. isolate RUG498	Methyl-accepting chemotaxis protein	670	dCache_1	56	275	233	1.6e-06	dCache_1~MCPsignal~~
Butyrivibrio sp. LB2008	Methyl-accepting chemotaxis protein	667	dCache_1	125	271	147	2.7e-14	dCache_1~MCPsignal~
Butyrivibrio sp. LC3010	Sensor histidine kinase	1255	dCache_1	35	260	226	1.4e-15	dCache_1~dCache_1~HisKA~HATPase_c~Response_reg~Hpt~
			dCache_1	421	613	193	7.7e-19
	Methyl-accepting chemotaxis protein	682	dCache_1	118	285	168	1e-07	dCache_1~HAMP~MCPsignal~
	Sensor histidine kinase	1183	dCache_1	348	578	231	1.5e-15	dCache_1~HisKA~HATPase_c~Response_reg~
Butyrivibrio sp. M55	Methyl-accepting chemotaxis protein	663	dCache_1	39	269	231	8.5e-22	dCache_1~MCPsignal~
Butyrivibrio sp. MC2013	Methyl-accepting chemotaxis protein	677	dCache_1	62	281	220	2.2e-12	dCache_1~HAMP~MCPsignal~
Butyrivibrio sp. MC2021	Methyl-accepting chemotaxis protein	680	dCache_1	116	283	168	3.2e-07	dCache_1~HAMP~MCPsignal~
Butyrivibrio sp. NC2007	Methyl-accepting chemotaxis protein	688	dCache_1	60	291	232	4.6e-13	dCache_1~HAMP~MCPsignal~
Butyrivibrio sp. NC3005	Methyl-accepting chemotaxis protein	675	dCache_1	115	278	164	7.8e-15	dCache_1~HAMP~MCPsignal~
	Methyl-accepting chemotaxis protein	678	dCache_1	116	282	167	2.1e-09	dCache_1~MCPsignal~
Butyrivibrio sp. OB235	Sensor histidine kinase	1258	dCache_1	49	220	172	3e-09	dCache_1~dCache_1~HisKA~HATPase_c~Response_reg~
			dCache_1	423	602	180	2e-18
	Methyl-accepting chemotaxis protein	684	dCache_1	121	287	167	1.5e-12	dCache_1~HAMP~MCPsignal~
	Sensor histidine kinase	1190	dCache_1	344	534	191	2.5e-15	dCache_1~HisKA~HATPase_c~Response_reg~
Butyrivibrio sp. Su6	Serine phosphatases	678	dCache_1	146	323	178	1.5e-18	dCache_1~HAMP~SpoIIE~
Butyrivibrio sp. TB	Methyl-accepting chemotaxis protein	675	dCache_1	59	279	221	3.2e-12	dCache_1~HAMP~MCPsignal~
	Serine phosphatases	707	dCache_1	160	331	172	9.1e-19	dCache_1~HAMP~SpoIIE~
Butyrivibrio sp. VCB2001	Methyl-accepting chemotaxis protein	689	dCache_1	61	292	232	5.8e-14	dCache_1~HAMP~MCPsignal~
Butyrivibrio sp. VCB2006	Methyl-accepting chemotaxis protein	680	dCache_1	116	283	168	2.7e-05	dCache_1~HAMP~MCPsignal~
	C-di-GMP-cyclases and diesterases	581	dCache_1	20	236	217	2.3e-18	dCache_1~GGDEF~
Butyrivibrio sp. VCD2006	Sensor histidine kinase	1187	dCache_1	348	581	234	6e-16	dCache_1~HisKA~HATPase_c~Response_reg~Hpt~
	Sensor histidine kinase	1269	dCache_1	105	235	131	1.2e-09	dCache_1~dCache_1~HisKA~HATPase_c~Response_reg~Hpt~
			dCache_1	423	622	200	8.3e-17
	Methyl-accepting chemotaxis protein	680	dCache_1	116	283	168	4.5e-07	dCache_1~HAMP~MCPsignal~
	Methyl-accepting chemotaxis protein	678	dCache_1	113	278	166	9.7e-09	dCache_1~HAMP~MCPsignal~
Butyrivibrio sp. WCD2001	Sensor histidine kinase	1258	dCache_1	49	220	172	3.9e-09	dCache_1~dCache_1~HisKA~HATPase_c~Response_reg~
			dCache_1	423	602	180	1.3e-18
	Sensor histidine kinase	1190	dCache_1	344	534	191	7e-16	dCache_1~HisKA~HATPase_c~Response_reg~
	Methyl-accepting chemotaxis protein	684	dCache_1	121	287	167	7.6e-13	dCache_1~HAMP~MCPsignal~
Butyrivibrio sp. WCE2006	Sensor histidine kinase	1255	dCache_1	34	260	227	2e-16	dCache_1~dCache_1~HisKA~HATPase_c~Response_reg~Hpt~
			dCache_1	421	613	193	7.7e-19
	Methyl-accepting chemotaxis protein	682	dCache_1	118	285	168	1e-07	dCache_1~HAMP~MCPsignal~
	Sensor histidine kinase	1183	dCache_1	348	578	231	1.5e-15	dCache_1~HisKA~HATPase_c~Response_reg~
Butyrivibrio sp. XBB1001	Methyl-accepting chemotaxis protein	680	dCache_1	116	283	168	2.3e-06	dCache_1~HAMP~MCPsignal~
Butyrivibrio sp. XPD2002	Sensor histidine kinase	1253	dCache_1	35	259	225	2.6e-08	dCache_1~dCache_1~HisKA~HATPase_c~Response_reg~Hpt~
			dCache_1	422	650	229	7.2e-16
	Methyl-accepting chemotaxis protein	685	dCache_1	120	287	168	3.3e-09	dCache_1~HAMP~MCPsignal~
Butyrivibrio sp. XPD2006	Methyl-accepting chemotaxis protein	670	dCache_1	43	273	231	1.1e-12	dCache_1~HAMP~MCPsignal~
Butyrivibrio sp. YAB3001	Methyl-accepting chemotaxis protein	679	dCache_1	115	282	168	1.2e-10	dCache_1~HAMP~MCPsignal~
	C-di-GMP-cyclases and diesterases	621	dCache_1	60	272	213	4.1e-18	dCache_1~GGDEF~
	Methyl-accepting chemotaxis protein	680	dCache_1	116	283	168	2.3e-06	dCache_1~HAMP~MCPsignal~
Clostridia bacterium isolate RUG235	Sensor histidine kinase	908	dCache_1	61	296	236	1.6e-17	dCache_1~HisKA~HATPase_c~Response_reg~
Clostridia bacterium isolate RUG474	Sensor histidine kinase	901	dCache_1	46	287	242	1.5e-21	dCache_1~HisKA~HATPase_c~Response_reg~Hpt~
Clostridiales bacterium isolate RUG241	C-di-GMP-cyclases and diesterases	650	dCache_1	35	274	240	2e-19	dCache_1~HD~Response_reg~
	C-di-GMP-cyclases and diesterases	817	dCache_1	345	568	224	3.7e-16	dCache_1~HD~
Clostridiales bacterium isolate RUG78	Sensor histidine kinase	906	dCache_1	50	269	220	1.2e-21	dCache_1~HisKA~HATPase_c~Response_reg~Hpt~
Clostridium aerotolerans DSM 5434	Methyl-accepting chemotaxis protein	692	dCache_1	64	303	240	5.6e-27	dCache_1~HAMP~MCPsignal~
	Methyl-accepting chemotaxis protein	671	dCache_1	50	283	234	3.4e-15	dCache_1~HAMP~MCPsignal~
Clostridium algidicarnis B3	Methyl-accepting chemotaxis protein	668	dCache_1	33	267	235	3.4e-28	dCache_1~MCPsignal~
Clostridium aminophilum F	Methyl-accepting chemotaxis protein	666	dCache_1	91	277	187	0.44	dCache_1~HAMP~MCPsignal~
	Methyl-accepting chemotaxis protein	673	dCache_1	37	282	246	4.6e-18	dCache_1~HAMP~MCPsignal~
	C-di-GMP-cyclases and diesterases	853	dCache_1	350	578	229	1.2e-16	dCache_1~HD~
Clostridium beijerinckii HUN142	Methyl-accepting chemotaxis protein	670	dCache_1	42	269	228	1.2e-26	dCache_1~MCPsignal~
	Methyl-accepting chemotaxis protein	667	dCache_1	51	272	222	2.9e-27	dCache_1~HAMP~MCPsignal~
Clostridium butyricum AGR2140	Methyl-accepting chemotaxis protein	668	dCache_1	51	272	222	1.6e-26	dCache_1~MCPsignal~
Clostridium cochlearium NLAE-zl-C224	Methyl-accepting chemotaxis protein	666	dCache_1	45	271	227	6e-24	dCache_1~HAMP~MCPsignal~
Clostridium intestinale DSM 6191	Methyl-accepting chemotaxis protein	667	dCache_1	44	272	229	1.3e-29	dCache_1~HAMP~MCPsignal~
Clostridium lundense DSM 17049	Methyl-accepting chemotaxis protein	669	dCache_1	45	274	230	7.3e-32	dCache_1~HAMP~MCPsignal~
	Methyl-accepting chemotaxis protein	669	dCache_1	45	274	230	4.6e-29	dCache_1~HAMP~MCPsignal~
	Methyl-accepting chemotaxis protein	668	dCache_1	47	273	227	2.7e-25	dCache_1~HAMP~MCPsignal~
Clostridium paraputrificum AGR2156	Methyl-accepting chemotaxis protein	668	dCache_1	121	269	149	2.6e-17	dCache_1~HAMP~MCPsignal~
Clostridium sartagoforme AAU1	Methyl-accepting chemotaxis protein	670	dCache_1	49	239	191	3.7e-20	dCache_1~MCPsignal~
Clostridium sp. DSM 8431	Methyl-accepting chemotaxis protein	530	dCache_1	43	263	221	1.2e-21	dCache_1~MCPsignal~
Enterobacter sp. KPR-6	Methyl-accepting chemotaxis protein	594	dCache_1	39	254	216	6.6e-18	dCache_1~HAMP~MCPsignal~
	Methyl-accepting chemotaxis protein	594	dCache_1	24	253	230	5.1e-17	dCache_1~HAMP~MCPsignal~
Enterococcus casseliflavus NLAE-zl-C414	Methyl-accepting chemotaxis protein	681	dCache_1	70	223	154	2.2e-19	dCache_1~MCPsignal~
Enterococcus casseliflavus NLAE-zl-G268	Methyl-accepting chemotaxis protein	681	dCache_1	70	223	154	2.2e-19	dCache_1~MCPsignal~
Enterococcus gallinarum SKF1	Methyl-accepting chemotaxis protein	681	dCache_1	66	229	164	1.9e-19	dCache_1~MCPsignal~
Erysipelotrichaceae bacterium isolate RUG173	C-di-GMP-cyclases and diesterases	938	dCache_1	31	259	229	2.1e-14	dCache_1~dCache_1~GGDEF~
			dCache_1	357	578	222	4.5e-18
Eubacterium ruminantium FB3002	Sensor histidine kinase	881	dCache_1	38	265	228	7.4e-20	dCache_1~HisKA~HATPase_c~Response_reg~Hpt~
	Sensor histidine kinase	1296	dCache_1	34	265	232	4.1e-14	dCache_1~dCache_1~HisKA~HATPase_c~Response_reg~
			dCache_1	433	608	176	8.9e-19
Eubacterium sp. isolate RUG1	Methyl-accepting chemotaxis protein	663	dCache_1	35	217	183	9.9e-16	dCache_1~MCPsignal~
	Sensor histidine kinase	1413	dCache_1	47	275	229	1.2e-19	dCache_1~dCache_1~HisKA~HATPase_c~Response_reg~Hpt~
			dCache_1	405	589	185	1.5e-11
	Methyl-accepting chemotaxis protein	670	dCache_1	52	275	224	2.3e-09	dCache_1~HAMP~MCPsignal~
Eubacterium sp. isolate RUG229	Sensor histidine kinase	1298	dCache_1	31	265	235	3.7e-13	dCache_1~dCache_1~HisKA~HATPase_c~Response_reg~Hpt~
			dCache_1	515	624	110	1.7e-16
	Sensor histidine kinase	925	dCache_1	44	264	221	9.3e-22	dCache_1~HisKA~HATPase_c~Response_reg~
Eubacterium sp. isolate RUG231	Sensor histidine kinase	893	dCache_1	44	282	239	3e-22	dCache_1~HisKA~HATPase_c~Response_reg~Hpt~
Eubacterium xylanophilum ATCC 35991	Methyl-accepting chemotaxis protein	662	dCache_1	116	269	154	6.8e-17	dCache_1~MCPsignal~
	C-di-GMP-cyclases and diesterases	826	dCache_1	389	577	189	8.3e-19	dCache_1~HD~
Firmicutes bacterium isolate RUG106	Methyl-accepting chemotaxis protein	1145	dCache_1	34	279	246	1.8e-18	dCache_1~HAMP~MCPsignal~
	Methyl-accepting chemotaxis protein	1161	dCache_1	36	292	257	2e-16	dCache_1~MCPsignal~
	C-di-GMP-cyclases and diesterases	519	dCache_1	153	295	143	1.4e-10	dCache_1~GGDEF~
	Sensor histidine kinase	943	dCache_1	137	278	142	1.5e-11	dCache_1~HisKA~HATPase_c~Response_reg~Hpt~
Firmicutes bacterium isolate RUG214	C-di-GMP-cyclases and diesterases	510	dCache_1	130	270	141	2.9e-10	dCache_1~HD~
Firmicutes bacterium isolate RUG264	Methyl-accepting chemotaxis protein	1164	dCache_1	36	294	259	4e-17	dCache_1~MCPsignal~
	Methyl-accepting chemotaxis protein	1146	dCache_1	36	281	246	4.3e-17	dCache_1~HAMP~MCPsignal~
	Sensor histidine kinase	935	dCache_1	58	273	216	1.9e-12	dCache_1~HisKA~HATPase_c~Response_reg~
Firmicutes bacterium isolate RUG297	Serine phosphatases	858	dCache_1	143	337	195	1.2e-17	TarH~dCache_1~HAMP~SpoIIE~HATPase_c_2~
Firmicutes bacterium isolate RUG495	Serine phosphatases	858	dCache_1	143	337	195	1.2e-17	TarH~dCache_1~HAMP~SpoIIE~HATPase_c_2~
Fretibacterium sp. isolate RUG11	Sensor histidine kinase	950	dCache_1	41	270	230	3.7e-09	dCache_1~HisKA~HATPase_c~Response_reg~
	Sensor histidine kinase	955	dCache_1	41	270	230	8e-09	dCache_1~HisKA~HATPase_c~Response_reg~Hpt~
Fusobacterium necrophorum HUN048	C-di-GMP-cyclases and diesterases	509	dCache_1	111	277	167	2.2e-14	dCache_1~GGDEF~
	Sensor histidine kinase	879	dCache_1	47	265	219	2.9e-18	dCache_1~HisKA~HATPase_c~Response_reg~Hpt~
Lachnobacterium bovis AE2004	Methyl-accepting chemotaxis protein	700	dCache_1	146	302	157	3.9e-13	dCache_1~HAMP~MCPsignal~
	Methyl-accepting chemotaxis protein	676	dCache_1	86	278	193	1.8e-12	dCache_1~MCPsignal~
	Methyl-accepting chemotaxis protein	680	dCache_1	115	284	170	5.7e-14	dCache_1~HAMP~MCPsignal~
Lachnobacterium bovis C6A12	Methyl-accepting chemotaxis protein	680	dCache_1	115	284	170	5.7e-14	dCache_1~HAMP~MCPsignal~
	Methyl-accepting chemotaxis protein	700	dCache_1	145	302	158	2.7e-13	dCache_1~HAMP~MCPsignal~
Lachnobacterium bovis DSM 14045	Methyl-accepting chemotaxis protein	699	dCache_1	125	301	177	1.1e-16	dCache_1~HAMP~MCPsignal~
	Methyl-accepting chemotaxis protein	676	dCache_1	75	280	206	9.7e-17	dCache_1~HAMP~MCPsignal~
Lachnobacterium bovis NK4B19	Methyl-accepting chemotaxis protein	700	dCache_1	146	302	157	4.2e-13	dCache_1~MCPsignal~
	Methyl-accepting chemotaxis protein	680	dCache_1	115	284	170	3.2e-14	dCache_1~HAMP~MCPsignal~
Lachnobacterium bovis S1b	Methyl-accepting chemotaxis protein	680	dCache_1	115	284	170	1.1e-13	dCache_1~HAMP~MCPsignal~
	Methyl-accepting chemotaxis protein	676	dCache_1	86	278	193	3.1e-12	dCache_1~MCPsignal~
	Methyl-accepting chemotaxis protein	700	dCache_1	146	302	157	4.2e-13	dCache_1~MCPsignal~
Lachnoclostridium aminophilum KH1P1	Methyl-accepting chemotaxis protein	666	dCache_1	91	277	187	9.8e-11	dCache_1~HAMP~MCPsignal~
	C-di-GMP-cyclases and diesterases	819	dCache_1	347	578	232	1.9e-16	dCache_1~HD~
	Methyl-accepting chemotaxis protein	692	dCache_1	56	301	246	2.7e-18	dCache_1~HAMP~MCPsignal~
Lachnoclostridium celerecrescens 18A	Methyl-accepting chemotaxis protein	671	dCache_1	43	283	241	3.3e-18	dCache_1~HAMP~MCPsignal~
Lachnoclostridium contortum NLAE-zl-C134	Methyl-accepting chemotaxis protein	717	dCache_1	53	294	242	1.6e-14	dCache_1~HAMP~MCPsignal~
	Methyl-accepting chemotaxis protein	718	dCache_1	61	295	235	4.6e-21	dCache_1~HAMP~MCPsignal~
Lachnospira multipara LB2003	Methyl-accepting chemotaxis protein	679	dCache_1	131	283	153	0.0006	dCache_1~HAMP~MCPsignal~
Lachnospira multipara MC2003	Methyl-accepting chemotaxis protein	679	dCache_1	131	283	153	0.0013	dCache_1~HAMP~MCPsignal~
Lachnospiraceae bacterium AB2028	Sensor histidine kinase	935	dCache_1	47	253	207	2.1e-15	dCache_1~HisKA~HATPase_c~Response_reg~
	Sensor histidine kinase	864	dCache_1	139	282	144	3.2e-15	dCache_1~HisKA~HATPase_c~Response_reg~
	C-di-GMP-cyclases and diesterases	666	dCache_1	71	293	223	1e-15	dCache_1~HD~Response_reg~
	Sensor histidine kinase	1333	dCache_1	125	268	144	7e-20	dCache_1~HisKA~HATPase_c~Response_reg~Hpt~
	Methyl-accepting chemotaxis protein	671	dCache_1	124	276	153	4.9e-08	dCache_1~HAMP~MCPsignal~
	Sensor histidine kinase	930	dCache_1	70	275	206	4.9e-14	dCache_1~HisKA~HATPase_c~Response_reg~Hpt~
	Sensor histidine kinase	817	dCache_1	57	279	223	6.2e-19	dCache_1~HisKA~HATPase_c~Response_reg~
Lachnospiraceae bacterium AC2014	Methyl-accepting chemotaxis protein	674	dCache_1	66	279	214	1.6e-12	dCache_1~MCPsignal~
Lachnospiraceae bacterium AC2028	Sensor histidine kinase	1218	dCache_1	348	556	209	8.7e-18	dCache_1~HisKA~HATPase_c~Response_reg~Hpt~
	Methyl-accepting chemotaxis protein	670	dCache_1	122	274	153	1.6e-09	dCache_1~HAMP~MCPsignal~
Lachnospiraceae bacterium AC2031	Sensor histidine kinase	862	dCache_1	38	265	228	3.6e-20	dCache_1~HisKA~HATPase_c~Response_reg~Hpt~
Lachnospiraceae bacterium AC3007	Sensor histidine kinase	1201	dCache_1	342	575	234	5.4e-20	dCache_1~HisKA~HATPase_c~Response_reg~Hpt~
Lachnospiraceae bacterium AD3010	C-di-GMP-cyclases and diesterases	637	dCache_1	124	293	170	1.9e-23	dCache_1~GGDEF~
	Sensor histidine kinase	937	dCache_1	121	272	152	1.7e-12	dCache_1~HisKA~HATPase_c~Response_reg~
	Sensor histidine kinase	1193	dCache_1	348	584	237	4.6e-18	dCache_1~HisKA~HATPase_c~Response_reg~Hpt~
	Sensor histidine kinase	801	dCache_1	55	275	221	2.3e-14	dCache_1~HisKA~HATPase_c~Response_reg~
Lachnospiraceae bacterium C6A11	Sensor histidine kinase	925	dCache_1	44	264	221	1.1e-21	dCache_1~HisKA~HATPase_c~Response_reg~Hpt~
	Sensor histidine kinase	1298	dCache_1	31	265	235	6.8e-14	dCache_1~dCache_1~HisKA~HATPase_c~Response_reg~Hpt~
			dCache_1	515	621	107	1.1e-16
Lachnospiraceae bacterium C7	Methyl-accepting chemotaxis protein	674	dCache_1	71	278	208	1.8e-12	dCache_1~HAMP~MCPsignal~
	Methyl-accepting chemotaxis protein	680	dCache_1	126	283	158	6.8e-14	dCache_1~HAMP~MCPsignal~
Lachnospiraceae bacterium G41	Sensor histidine kinase	882	dCache_1	34	275	242	8.2e-22	dCache_1~HisKA~HATPase_c~Response_reg~
	Sensor histidine kinase	933	dCache_1	97	313	217	1.3e-12	dCache_1~HisKA~HATPase_c~Response_reg~Hpt~
Lachnospiraceae bacterium isolate RUG100	Sensor histidine kinase	931	dCache_1	53	272	220	6.5e-13	dCache_1~HisKA~HATPase_c~Response_reg~Hpt~
	Sensor histidine kinase	825	dCache_1	61	285	225	1.1e-15	dCache_1~HisKA~HATPase_c~Response_reg~
	C-di-GMP-cyclases and diesterases	641	dCache_1	55	267	213	1.6e-13	dCache_1~HD~Response_reg~
Lachnospiraceae bacterium isolate RUG102	Methyl-accepting chemotaxis protein	677	dCache_1	117	272	156	1.4e-10	dCache_1~MCPsignal~
Lachnospiraceae bacterium isolate RUG105	Methyl-accepting chemotaxis protein	671	dCache_1	38	276	239	1.5e-09	dCache_1~HAMP~MCPsignal~
	Methyl-accepting chemotaxis protein	661	dCache_1	56	266	228	4.3e-10	dCache_1~MCPsignal~~
Lachnospiraceae bacterium isolate RUG109	Methyl-accepting chemotaxis protein	666	dCache_1	52	272	221	5.5e-09	dCache_1~HAMP~MCPsignal~
	Sensor histidine kinase	932	dCache_1	93	267	175	2.3e-11	dCache_1~HisKA~HATPase_c~Response_reg~
	Sensor histidine kinase	807	dCache_1	59	274	216	2.8e-12	dCache_1~HisKA~HATPase_c~Response_reg~
	Sensor histidine kinase	1333	dCache_1	125	268	144	1.1e-19	dCache_1~HisKA~HATPase_c~Response_reg~Hpt~
Lachnospiraceae bacterium isolate RUG114	Sensor histidine kinase	1234	dCache_1	37	266	230	8.4e-08	dCache_1~dCache_1~HisKA~HATPase_c~Response_reg~
			dCache_1	500	650	151	1.4e-12
Lachnospiraceae bacterium isolate RUG120	Sensor histidine kinase	798	dCache_1	52	272	221	3.8e-18	dCache_1~HisKA~HATPase_c~Response_reg~
	Methyl-accepting chemotaxis protein	669	dCache_1	124	274	151	4.9e-06	dCache_1~MCPsignal~~
Lachnospiraceae bacterium isolate RUG133	Sensor histidine kinase	886	dCache_1	34	275	242	2.4e-19	dCache_1~HisKA~HATPase_c~Response_reg~
Lachnospiraceae bacterium isolate RUG136	Sensor histidine kinase	792	dCache_1	49	271	223	1.1e-17	dCache_1~HisKA~HATPase_c~Response_reg~
	C-di-GMP-cyclases and diesterases	641	dCache_1	50	267	218	1.7e-16	dCache_1~HD~Response_reg~
	Methyl-accepting chemotaxis protein	671	dCache_1	40	275	236	4.3e-10	dCache_1~HAMP~MCPsignal~
	Sensor histidine kinase	1004	dCache_1	131	287	157	1.3e-14	dCache_1~HisKA~HATPase_c~Response_reg~
Lachnospiraceae bacterium isolate RUG141	Methyl-accepting chemotaxis protein	677	dCache_1	127	276	150	1.4e-11	dCache_1~HAMP~MCPsignal~
	Methyl-accepting chemotaxis protein	663	dCache_1	44	268	225	6e-20	dCache_1~MCPsignal~
	Sensor histidine kinase	1385	dCache_1	33	257	225	1e-16	dCache_1~dCache_1~HisKA~HATPase_c~Response_reg~
			dCache_1	420	642	223	4.1e-15
Lachnospiraceae bacterium isolate RUG144	Methyl-accepting chemotaxis protein	657	dCache_1	39	263	225	2e-14	dCache_1~MCPsignal~
	Sensor histidine kinase	1245	dCache_1	33	217	185	1.7e-09	dCache_1~dCache_1~HisKA~HATPase_c~Response_reg~Hpt~
			dCache_1	424	593	170	3.9e-13
	Sensor histidine kinase	784	dCache_1	50	270	221	1.8e-20	dCache_1~HisKA~HATPase_c~Response_reg~
	Sensor histidine kinase	794	dCache_1	52	275	224	1.9e-17	dCache_1~HisKA~HATPase_c~Response_reg~
	Methyl-accepting chemotaxis protein	669	dCache_1	122	274	153	2.9e-07	dCache_1~MCPsignal~
Lachnospiraceae bacterium isolate RUG157	Sensor histidine kinase	789	dCache_1	53	275	223	6.6e-16	dCache_1~HisKA~HATPase_c~Response_reg~
	Sensor histidine kinase	758	dCache_1	61	270	210	1.1e-11	dCache_1~HisKA~Response_reg~Hpt~
	Methyl-accepting chemotaxis protein	670	dCache_1	123	275	153	2.8e-10	dCache_1~HAMP~MCPsignal~
	Methyl-accepting chemotaxis protein	663	dCache_1	36	269	234	3.1e-25	dCache_1~MCPsignal~
Lachnospiraceae bacterium isolate RUG159	C-di-GMP-cyclases and diesterases	648	dCache_1	40	269	230	2.4e-15	dCache_1~HD~Response_reg~
	Methyl-accepting chemotaxis protein	666	dCache_1	127	232	106	9.2e-13	dCache_1~HAMP~MCPsignal~
Lachnospiraceae bacterium isolate RUG161	Methyl-accepting chemotaxis protein	663	dCache_1	36	269	234	8.4e-23	dCache_1~MCPsignal~
	Sensor histidine kinase	797	dCache_1	51	278	228	4.7e-14	dCache_1~HisKA~HATPase_c~Response_reg~
	Sensor histidine kinase	1191	dCache_1	341	574	234	7.9e-17	dCache_1~HisKA~HATPase_c~Response_reg~Hpt~
Lachnospiraceae bacterium isolate RUG184	Sensor histidine kinase	1264	dCache_1	79	262	184	7.4e-09	dCache_1~dCache_1~HisKA~HATPase_c~Response_reg~Hpt~
			dCache_1	422	650	229	1.6e-18
Lachnospiraceae bacterium isolate RUG189	Methyl-accepting chemotaxis protein	656	dCache_1	49	256	208	1.6e-12	dCache_1~HAMP~MCPsignal~
	Sensor histidine kinase	810	dCache_1	57	278	222	9.1e-15	dCache_1~HisKA~HATPase_c~Response_reg~
	Methyl-accepting chemotaxis protein	671	dCache_1	54	276	223	2.9e-09	dCache_1~HAMP~MCPsignal~
	Sensor histidine kinase	816	dCache_1	13	106	94	6.3e-17	dCache_1~HisKA~HATPase_c~Response_reg~
	Sensor histidine kinase	887	dCache_1	30	267	238	1e-17	dCache_1~HisKA~HATPase_c~Response_reg~
	Methyl-accepting chemotaxis protein	663	dCache_1	87	269	183	2e-20	dCache_1~MCPsignal~
Lachnospiraceae bacterium isolate RUG194	Sensor histidine kinase	856	dCache_1	32	265	234	1e-15	dCache_1~HisKA~HATPase_c~Response_reg~
	Sensor histidine kinase	928	dCache_1	49	267	219	7.5e-12	dCache_1~HisKA~HATPase_c~Response_reg~Hpt~
	Sensor histidine kinase	932	dCache_1	126	262	137	1.8e-13	dCache_1~HisKA~HATPase_c~Response_reg~
	Sensor histidine kinase	1578	dCache_1	281	495	215	7.1e-11	dCache_1~dCache_1~HisKA~HATPase_c~Response_reg~Hpt~
			dCache_1	729	833	105	4.4e-13
	C-di-GMP-cyclases and diesterases	528	dCache_1	84	309	226	7.5e-14	dCache_1~GGDEF~
Lachnospiraceae bacterium isolate RUG200	Sensor histidine kinase	887	dCache_1	35	274	240	1.6e-19	dCache_1~HisKA~HATPase_c~Response_reg~Hpt~
	Sensor histidine kinase	927	dCache_1	64	271	208	9.5e-11	dCache_1~HisKA~HATPase_c~Response_reg~Hpt~
	Sensor histidine kinase	1531	dCache_1	357	463	107	0.00017	dCache_1~dCache_1~HisKA~HATPase_c~Response_reg~Hpt~
			dCache_1	669	890	222	1.8e-15
Lachnospiraceae bacterium isolate RUG206	Methyl-accepting chemotaxis protein	671	dCache_1	38	276	239	7.2e-10	dCache_1~HAMP~MCPsignal~
	C-di-GMP-cyclases and diesterases	640	dCache_1	73	266	194	7.1e-16	dCache_1~HD~Response_reg~
	Sensor histidine kinase	1239	dCache_1	343	578	236	9.1e-19	dCache_1~HisKA~HATPase_c~Response_reg~Hpt~
Lachnospiraceae bacterium isolate RUG211	Methyl-accepting chemotaxis protein	667	dCache_1	38	274	237	2.8e-25	dCache_1~MCPsignal~
	Sensor histidine kinase	1179	dCache_1	344	576	233	5.6e-20	dCache_1~HisKA~HATPase_c~Response_reg~
	C-di-GMP-cyclases and diesterases	652	dCache_1	34	275	242	3.1e-19	dCache_1~HD~Response_reg~
Lachnospiraceae bacterium isolate RUG225	Methyl-accepting chemotaxis protein	671	dCache_1	91	276	186	2.2e-08	dCache_1~HAMP~MCPsignal~
	C-di-GMP-cyclases and diesterases	784	dCache_1	83	275	193	7.8e-11	dCache_1~GGDEF~
	Methyl-accepting chemotaxis protein	663	dCache_1	35	269	235	4.4e-19	dCache_1~MCPsignal~
	Sensor histidine kinase	815	dCache_1	55	276	222	4.1e-17	dCache_1~HisKA~HATPase_c~Response_reg~
	Sensor histidine kinase	915	dCache_1	57	275	219	3.1e-15	dCache_1~HisKA~Response_reg~Hpt~
Lachnospiraceae bacterium isolate RUG242	Methyl-accepting chemotaxis protein	670	dCache_1	118	275	158	3.7e-07	dCache_1~HAMP~MCPsignal~
Lachnospiraceae bacterium isolate RUG249	Methyl-accepting chemotaxis protein	671	dCache_1	125	277	153	2.6e-07	dCache_1~HAMP~MCPsignal~
	Sensor histidine kinase	715	dCache_1	53	281	229	4.9e-17	dCache_1~HisKA~HATPase_c~Response_reg~
	Sensor histidine kinase	1062	dCache_1	43	267	225	2.3e-14	dCache_1~HisKA~HATPase_c~Response_reg~Hpt~
	C-di-GMP-cyclases and diesterases	625	dCache_1	135	267	133	1e-12	dCache_1~GGDEF~
Lachnospiraceae bacterium isolate RUG250	Methyl-accepting chemotaxis protein	680	dCache_1	118	283	166	5.1e-13	dCache_1~MCPsignal~
Lachnospiraceae bacterium isolate RUG262	Sensor histidine kinase	932	dCache_1	120	271	152	2e-11	dCache_1~HisKA~HATPase_c~Response_reg~Hpt~
Lachnospiraceae bacterium isolate RUG265	C-di-GMP-cyclases and diesterases	650	dCache_1	36	275	240	9e-28	dCache_1~HD~Response_reg~
	Sensor histidine kinase	683	dCache_1	102	286	185	2.6e-09	dCache_1~HisKA~HATPase_c~Response_reg~Hpt~
Lachnospiraceae bacterium isolate RUG284	Sensor histidine kinase	874	dCache_1	27	268	242	3.5e-21	dCache_1~HisKA~HATPase_c~Response_reg~
	Sensor histidine kinase	933	dCache_1	97	313	217	2.7e-12	dCache_1~HisKA~HATPase_c~Response_reg~Hpt~
Lachnospiraceae bacterium isolate RUG289	Sensor histidine kinase	780	dCache_1	44	273	230	5.4e-13	dCache_1~HisKA~Response_reg~Hpt~
	C-di-GMP-cyclases and diesterases	617	dCache_1	73	276	204	2.2e-16	dCache_1~GGDEF~
Lachnospiraceae bacterium isolate RUG290	Methyl-accepting chemotaxis protein	674	dCache_1	57	277	221	2e-16	dCache_1~HAMP~MCPsignal~
Lachnospiraceae bacterium isolate RUG308	Sensor histidine kinase	861	dCache_1	39	264	226	9.9e-14	dCache_1~HisKA~HATPase_c~Response_reg~
	Sensor histidine kinase	1535	dCache_1	279	496	218	5e-13	dCache_1~dCache_1~HisKA~HATPase_c~Response_reg~
			dCache_1	668	837	170	3.9e-13
	Sensor histidine kinase	727	dCache_1	131	272	142	1.2e-15	dCache_1~HisKA~HATPase_c~Response_reg~
Lachnospiraceae bacterium isolate RUG312	Sensor histidine kinase	1210	dCache_1	353	584	232	2e-16	dCache_1~HisKA~HATPase_c~Response_reg~
	Methyl-accepting chemotaxis protein	671	dCache_1	96	275	180	1.6e-08	dCache_1~MCPsignal~
Lachnospiraceae bacterium isolate RUG326	Methyl-accepting chemotaxis protein	663	dCache_1	59	268	210	4.5e-20	dCache_1~MCPsignal~
	Sensor histidine kinase	1262	dCache_1	43	258	216	2.4e-11	dCache_1~dCache_1~HisKA~HATPase_c~Response_reg~
			dCache_1	426	646	221	1.8e-14
Lachnospiraceae bacterium isolate RUG334	Sensor histidine kinase	1201	dCache_1	348	556	209	6e-18	dCache_1~HisKA~HATPase_c~Response_reg~
	Methyl-accepting chemotaxis protein	670	dCache_1	123	274	152	7.9e-10	dCache_1~HAMP~MCPsignal~
Lachnospiraceae bacterium isolate RUG345	Sensor histidine kinase	887	dCache_1	38	265	228	5.7e-19	dCache_1~HisKA~HATPase_c~Response_reg~
Lachnospiraceae bacterium isolate RUG358	Sensor histidine kinase	858	dCache_1	33	275	243	1.4e-16	dCache_1~HisKA~HATPase_c~Response_reg~
	Sensor histidine kinase	857	dCache_1	33	264	232	1e-13	dCache_1~HisKA~HATPase_c~Response_reg~
	Sensor histidine kinase	1533	dCache_1	278	494	217	1.5e-10	dCache_1~dCache_1~HisKA~HATPase_c~Response_reg~
			dCache_1	742	835	94	4.7e-13
Lachnospiraceae bacterium isolate RUG37	Sensor histidine kinase	794	dCache_1	45	275	231	1.7e-19	dCache_1~HisKA~HATPase_c~Response_reg~
	Methyl-accepting chemotaxis protein	657	dCache_1	50	258	209	1.9e-18	dCache_1~MCPsignal~
	Methyl-accepting chemotaxis protein	663	dCache_1	35	268	234	7.5e-24	dCache_1~MCPsignal~
	Sensor histidine kinase	1197	dCache_1	342	545	204	7.2e-17	dCache_1~HisKA~HATPase_c~Response_reg~Hpt~
	Sensor histidine kinase	896	dCache_1	47	275	229	1.7e-17	dCache_1~HisKA~HATPase_c~Response_reg~
	Sensor histidine kinase	1494	dCache_1	332	495	164	1.1e-08	dCache_1~dCache_1~HisKA~HATPase_c~Response_reg~Hpt~
			dCache_1	666	839	174	5e-16
Lachnospiraceae bacterium isolate RUG371	Sensor histidine kinase	795	dCache_1	55	273	219	3.1e-17	dCache_1~HisKA~HATPase_c~Response_reg~
	C-di-GMP-cyclases and diesterases	621	dCache_1	4	241	238	6.5e-23	dCache_1~HD~Response_reg~
	Sensor histidine kinase	1198	dCache_1	347	578	232	4.5e-19	dCache_1~HisKA~HATPase_c~Response_reg~Hpt~
	Serine phosphatases	738	dCache_1	154	286	133	7.1e-17	dCache_1~SpoIIE~
	Sensor histidine kinase	906	dCache_1	47	256	210	8.1e-16	dCache_1~HisKA~HATPase_c~Response_reg~
Lachnospiraceae bacterium isolate RUG395	Sensor histidine kinase	803	dCache_1	50	278	229	2.1e-18	dCache_1~HisKA~HATPase_c~Response_reg~
	Sensor histidine kinase	797	dCache_1	49	278	230	3.7e-17	dCache_1~HisKA~HATPase_c~Response_reg~
	Sensor histidine kinase	928	dCache_1	54	268	215	1.1e-10	dCache_1~HisKA~HATPase_c~Response_reg~
	Methyl-accepting chemotaxis protein	663	dCache_1	118	269	152	4.9e-21	dCache_1~MCPsignal~
Lachnospiraceae bacterium isolate RUG406	Methyl-accepting chemotaxis protein	663	dCache_1	59	268	210	4.5e-20	dCache_1~MCPsignal~
	Sensor histidine kinase	1313	dCache_1	43	258	216	2.5e-11	dCache_1~dCache_1~HisKA~HATPase_c~Response_reg~
			dCache_1	426	646	221	1.9e-14
Lachnospiraceae bacterium isolate RUG424	Methyl-accepting chemotaxis protein	671	dCache_1	122	275	154	7.3e-11	dCache_1~HAMP~MCPsignal~
	Methyl-accepting chemotaxis protein	670	dCache_1	41	274	234	3.5e-11	dCache_1~HAMP~MCPsignal~
	Sensor histidine kinase	1224	dCache_1	354	585	232	1.7e-14	dCache_1~HisKA~HATPase_c~Response_reg~
Lachnospiraceae bacterium isolate RUG434	Sensor histidine kinase	883	dCache_1	34	276	243	9.3e-23	dCache_1~HisKA~HATPase_c~Response_reg~Hpt~
	Methyl-accepting chemotaxis protein	658	dCache_1	109	264	156	9.3e-12	dCache_1~MCPsignal~
	Sensor histidine kinase	1490	dCache_1	280	496	217	4.6e-11	dCache_1~dCache_1~HisKA~HATPase_c~Response_reg~Hpt~
			dCache_1	667	834	168	1.5e-13
	Sensor histidine kinase	797	dCache_1	44	275	232	8.8e-19	dCache_1~HisKA~HATPase_c~Response_reg~
Lachnospiraceae bacterium isolate RUG451	Sensor histidine kinase	1535	dCache_1	279	496	218	5e-13	dCache_1~dCache_1~HisKA~HATPase_c~Response_reg~
			dCache_1	668	837	170	3.9e-13
	Sensor histidine kinase	861	dCache_1	39	264	226	8.2e-14	dCache_1~HisKA~HATPase_c~Response_reg~
Lachnospiraceae bacterium isolate RUG456	Sensor histidine kinase	1116	dCache_1	139	301	163	2.3e-14	dCache_1~HisKA~HATPase_c~Response_reg~~
	Sensor histidine kinase	727	dCache_1	131	272	142	1.2e-15	dCache_1~HisKA~HATPase_c~Response_reg~
Lachnospiraceae bacterium isolate RUG462	Sensor histidine kinase	1324	dCache_1	37	267	231	6e-15	dCache_1~dCache_1~HisKA~HATPase_c~Response_reg~
	Sensor histidine kinase	880	dCache_1	49	264	216	6.6e-19	dCache_1~HisKA~HATPase_c~Response_reg~Hpt~
	Sensor histidine kinase	793	dCache_1	105	271	167	4.9e-15	dCache_1~HisKA~HATPase_c~Response_reg~
Lachnospiraceae bacterium isolate RUG465	Sensor histidine kinase	722	dCache_1	142	286	145	1.2e-16	dCache_1~HisKA~HATPase_c~Response_reg~
	Methyl-accepting chemotaxis protein	667	dCache_1	40	273	234	7.9e-23	dCache_1~MCPsignal~
Lachnospiraceae bacterium isolate RUG493	Methyl-accepting chemotaxis protein	663	dCache_1	59	268	210	3.6e-20	dCache_1~MCPsignal~
Lachnospiraceae bacterium isolate RUG499	Sensor histidine kinase	1556	dCache_1	105	280	176	2.7e-11	dCache_1~HisKA~HATPase_c~Response_reg~HisKA~HATPase_c~Response_reg~
	Methyl-accepting chemotaxis protein	677	dCache_1	113	274	162	1.4e-08	dCache_1~MCPsignal~
Lachnospiraceae bacterium isolate RUG500	Sensor histidine kinase	1556	dCache_1	105	280	176	2.7e-11	dCache_1~HisKA~HATPase_c~Response_reg~HisKA~HATPase_c~Response_reg~
	Methyl-accepting chemotaxis protein	677	dCache_1	109	273	165	1e-09	dCache_1~MCPsignal~
	Methyl-accepting chemotaxis protein	672	dCache_1	92	201	110	0.00033	dCache_1~MCPsignal~~
Lachnospiraceae bacterium isolate RUG518	Sensor histidine kinase	1224	dCache_1	354	585	232	1.7e-14	dCache_1~HisKA~HATPase_c~Response_reg~
	Methyl-accepting chemotaxis protein	670	dCache_1	41	274	234	1.3e-11	dCache_1~HAMP~MCPsignal~
	Methyl-accepting chemotaxis protein	671	dCache_1	112	275	164	3.8e-10	dCache_1~HAMP~MCPsignal~
Lachnospiraceae bacterium isolate RUG523	Methyl-accepting chemotaxis protein	670	dCache_1	122	274	153	2.5e-09	dCache_1~HAMP~MCPsignal~
	Sensor histidine kinase	1201	dCache_1	348	556	209	6e-18	dCache_1~HisKA~HATPase_c~Response_reg~
Lachnospiraceae bacterium isolate RUG532	Methyl-accepting chemotaxis protein	663	dCache_1	92	269	178	2e-19	dCache_1~MCPsignal~
	Sensor histidine kinase	725	dCache_1	129	268	140	7.5e-19	dCache_1~HisKA~HATPase_c~Response_reg~
	Methyl-accepting chemotaxis protein	675	dCache_1	123	272	150	3.9e-14	dCache_1~HAMP~MCPsignal~
Lachnospiraceae bacterium isolate RUG536	Methyl-accepting chemotaxis protein	667	dCache_1	40	272	233	2.1e-08	dCache_1~HAMP~MCPsignal~
Lachnospiraceae bacterium isolate RUG54	Sensor histidine kinase	1547	dCache_1	119	283	165	7e-11	dCache_1~HisKA~HATPase_c~Response_reg~HisKA~HATPase_c~Response_reg~
	Methyl-accepting chemotaxis protein	677	dCache_1	115	274	160	7.7e-14	dCache_1~MCPsignal~
Lachnospiraceae bacterium isolate RUG70	Sensor histidine kinase	1241	dCache_1	111	274	164	4.5e-14	dCache_1~dCache_1~HisKA~HATPase_c~Response_reg~Hpt~
			dCache_1	443	625	183	3.8e-15
Lachnospiraceae bacterium isolate RUG72	Sensor histidine kinase	911	dCache_1	38	265	228	1e-21	dCache_1~HisKA~HATPase_c~Response_reg~
	hypothetical protein	211	dCache_1	124	194	71	5.8e-12	dCache_1~
Lachnospiraceae bacterium isolate RUG8	Sensor histidine kinase	474	dCache_1	68	234	167	6e-11	dCache_1~Hpt~
	Sensor histidine kinase	1195	dCache_1	355	572	218	5.7e-16	dCache_1~HisKA~HATPase_c~Response_reg~Hpt~
	Sensor histidine kinase	925	dCache_1	57	277	221	8.8e-15	dCache_1~HisKA~HATPase_c~Response_reg~
	Methyl-accepting chemotaxis protein	670	dCache_1	124	274	151	2.9e-07	dCache_1~HAMP~MCPsignal~~
Lachnospiraceae bacterium JC7	Serine phosphatases	707	dCache_1	156	331	176	3.4e-21	dCache_1~HAMP~SpoIIE~~
Lachnospiraceae bacterium KH1P17	Methyl-accepting chemotaxis protein	669	dCache_1	109	272	164	1.5e-14	dCache_1~HAMP~MCPsignal~
	Methyl-accepting chemotaxis protein	678	dCache_1	114	282	169	1.6e-16	dCache_1~HAMP~MCPsignal~
	C-di-GMP-cyclases and diesterases	640	dCache_1	124	266	143	6.3e-15	dCache_1~HD~Response_reg~
	Methyl-accepting chemotaxis protein	693	dCache_1	81	297	217	3.3e-16	dCache_1~MCPsignal~
Lachnospiraceae bacterium KH1T2	Methyl-accepting chemotaxis protein	688	dCache_1	129	292	164	5.1e-16	dCache_1~MCPsignal~
	Methyl-accepting chemotaxis protein	678	dCache_1	122	282	161	2e-15	dCache_1~MCPsignal~
	Methyl-accepting chemotaxis protein	678	dCache_1	133	281	149	4.5e-12	dCache_1~HAMP~MCPsignal~
Lachnospiraceae bacterium KHCPX20	Methyl-accepting chemotaxis protein	673	dCache_1	129	277	149	7.4e-12	dCache_1~HAMP~MCPsignal~
Lachnospiraceae bacterium LC2019	Sensor histidine kinase	1268	dCache_1	30	264	235	2.1e-21	dCache_1~dCache_1~HisKA~HATPase_c~Response_reg~Hpt~
			dCache_1	441	604	164	6.9e-18
	Sensor histidine kinase	882	dCache_1	40	275	236	4.4e-18	dCache_1~HisKA~HATPase_c~Response_reg~Hpt~
Lachnospiraceae bacterium MA2020	Methyl-accepting chemotaxis protein	677	dCache_1	90	281	192	8.8e-11	dCache_1~HAMP~MCPsignal~
	Methyl-accepting chemotaxis protein	681	dCache_1	50	284	235	1.8e-08	dCache_1~MCPsignal~
Lachnospiraceae bacterium MC2017	Sensor histidine kinase	1225	dCache_1	63	272	210	3.4e-11	dCache_1~HAMP~HisKA~HATPase_c~Response_reg~Hpt~
	Methyl-accepting chemotaxis protein	670	dCache_1	110	273	164	7.4e-13	dCache_1~HAMP~MCPsignal~
Lachnospiraceae bacterium NC2004	Methyl-accepting chemotaxis protein	655	dCache_1	107	262	156	1.9e-16	dCache_1~MCPsignal~
	Sensor histidine kinase	1094	dCache_1	44	259	216	3.5e-12	dCache_1~dCache_1~HisKA~HATPase_c~Response_reg~
			dCache_1	417	631	215	8.2e-19
	Sensor histidine kinase	745	dCache_1	64	290	227	3.4e-20	dCache_1~HisKA~HATPase_c~Response_reg~
	Methyl-accepting chemotaxis protein	668	dCache_1	39	268	230	4.2e-21	dCache_1~MCPsignal~
	Sensor histidine kinase	921	dCache_1	57	271	215	8.5e-14	dCache_1~HisKA~HATPase_c~Response_reg~Hpt~
Lachnospiraceae bacterium NC2008	Sensor histidine kinase	1062	dCache_1	43	267	225	2.2e-14	dCache_1~HisKA~HATPase_c~Response_reg~Hpt~
	Sensor histidine kinase	715	dCache_1	53	281	229	2.9e-17	dCache_1~HisKA~HATPase_c~Response_reg~
	C-di-GMP-cyclases and diesterases	625	dCache_1	135	267	133	3.5e-12	dCache_1~GGDEF~
	Methyl-accepting chemotaxis protein	671	dCache_1	124	276	153	5.6e-07	dCache_1~HAMP~MCPsignal~
Lachnospiraceae bacterium ND2006	Methyl-accepting chemotaxis protein	678	dCache_1	133	281	149	1.1e-11	dCache_1~HAMP~MCPsignal~
	Methyl-accepting chemotaxis protein	688	dCache_1	129	292	164	1.1e-15	dCache_1~MCPsignal~
	Methyl-accepting chemotaxis protein	678	dCache_1	122	282	161	2e-15	dCache_1~MCPsignal~
Lachnospiraceae bacterium NE2001	Sensor histidine kinase	852	dCache_1	39	265	227	9.8e-19	dCache_1~HisKA~HATPase_c~Response_reg~Hpt~
	Sensor histidine kinase	862	dCache_1	38	275	238	5.9e-19	dCache_1~HisKA~HATPase_c~Response_reg~Hpt~
Lachnospiraceae bacterium NK4A136	Sensor histidine kinase	1062	dCache_1	46	268	223	1.6e-14	dCache_1~HisKA~HATPase_c~Response_reg~Hpt~
	Sensor histidine kinase	715	dCache_1	53	281	229	2.2e-17	dCache_1~HisKA~HATPase_c~Response_reg~
	C-di-GMP-cyclases and diesterases	625	dCache_1	128	267	140	4.8e-13	dCache_1~GGDEF~
	Methyl-accepting chemotaxis protein	671	dCache_1	122	276	155	1.3e-07	dCache_1~HAMP~MCPsignal~
Lachnospiraceae bacterium NK4A144	Methyl-accepting chemotaxis protein	678	dCache_1	62	282	221	5.5e-13	dCache_1~MCPsignal~
	Methyl-accepting chemotaxis protein	670	dCache_1	110	273	164	6e-16	dCache_1~MCPsignal~
Lachnospiraceae bacterium NK4A179	Methyl-accepting chemotaxis protein	669	dCache_1	124	274	151	1.3e-06	dCache_1~MCPsignal~
Lachnospiraceae bacterium P6A3	Methyl-accepting chemotaxis protein	670	dCache_1	43	274	232	3.7e-15	dCache_1~HAMP~MCPsignal~
	Sensor histidine kinase	1224	dCache_1	354	585	232	7.1e-17	dCache_1~HisKA~HATPase_c~Response_reg~
	Methyl-accepting chemotaxis protein	671	dCache_1	112	275	164	3.9e-10	dCache_1~MCPsignal~
Lachnospiraceae bacterium P6B14	Methyl-accepting chemotaxis protein	671	dCache_1	40	268	229	1.9e-15	dCache_1~MCPsignal~
	Sensor histidine kinase	1397	dCache_1	37	275	239	4.2e-19	dCache_1~dCache_1~HisKA~HATPase_c~Response_reg~Hpt~
			dCache_1	420	589	170	1.7e-10
	Sensor histidine kinase	1495	dCache_1	49	277	229	4.1e-15	dCache_1~HisKA~HATPase_c~Response_reg~Fe_hyd_lg_C~HisKA~
Lachnospiraceae bacterium RM5	Sensor histidine kinase	1251	dCache_1	33	260	228	6.9e-08	dCache_1~dCache_1~HisKA~HATPase_c~Response_reg~
			dCache_1	434	649	216	2.5e-18
Lachnospiraceae bacterium V9D3004	Sensor histidine kinase	793	dCache_1	54	278	225	6.5e-13	dCache_1~HisKA~HATPase_c~Response_reg~
	hypothetical protein	444	dCache_1	87	257	171	7.1e-18	dCache_1~
	Sensor histidine kinase	860	dCache_1	134	281	148	3.9e-11	dCache_1~HisKA~HATPase_c~Response_reg~~
	Methyl-accepting chemotaxis protein	671	dCache_1	42	276	235	4.5e-23	dCache_1~MCPsignal~
	Sensor histidine kinase	1096	dCache_1	47	261	215	8.8e-11	dCache_1~dCache_1~HisKA~HATPase_c~Response_reg~
			dCache_1	423	615	193	3.9e-16
	Methyl-accepting chemotaxis protein	649	dCache_1	113	239	127	1.5e-14	dCache_1~HAMP~MCPsignal~
	Sensor histidine kinase	861	dCache_1	57	278	222	2.9e-16	dCache_1~HisKA~HATPase_c~Response_reg~
	Methyl-accepting chemotaxis protein	692	dCache_1	62	297	236	9.9e-08	dCache_1~HAMP~MCPsignal~
Lachnospiraceae bacterium XBB1006	Methyl-accepting chemotaxis protein	677	dCache_1	119	280	162	7.5e-09	dCache_1~HAMP~MCPsignal~
	Sensor histidine kinase	931	dCache_1	39	270	232	3.3e-08	dCache_1~HisKA~HATPase_c~Response_reg~Hpt~
	Methyl-accepting chemotaxis protein	670	dCache_1	65	267	203	2.7e-16	dCache_1~MCPsignal~
	Methyl-accepting chemotaxis protein	664	dCache_1	97	265	169	7.5e-13	dCache_1~MCPsignal~
	Methyl-accepting chemotaxis protein	674	dCache_1	111	278	168	6.4e-09	dCache_1~HAMP~MCPsignal~
Lachnospiraceae bacterium XBB2008	Sensor histidine kinase	886	dCache_1	37	277	241	6.2e-21	dCache_1~HisKA~HATPase_c~Response_reg~
	Sensor histidine kinase	799	dCache_1	53	275	223	3.9e-17	dCache_1~HisKA~HATPase_c~Response_reg~
	Sensor histidine kinase	1004	dCache_1	141	286	146	1.2e-16	dCache_1~HisKA~HATPase_c~Response_reg~Hpt~
	C-di-GMP-cyclases and diesterases	618	dCache_1	134	275	142	3.5e-15	dCache_1~GGDEF~
	Sensor histidine kinase	1206	dCache_1	349	577	229	1.7e-15	dCache_1~HisKA~HATPase_c~Response_reg~Hpt~
Lachnospiraceae bacterium XPB1003	Methyl-accepting chemotaxis protein	671	dCache_1	124	275	152	7.8e-08	dCache_1~HAMP~MCPsignal~
	Methyl-accepting chemotaxis protein	662	dCache_1	51	263	213	3.4e-16	dCache_1~MCPsignal~
Lachnospiraceae bacterium YSB2008	Sensor histidine kinase	1255	dCache_1	33	264	232	1.1e-18	dCache_1~dCache_1~HisKA~HATPase_c~Response_reg~
			dCache_1	406	626	221	2.6e-19
Lactobacillus ruminis ATCC 27782	Methyl-accepting chemotaxis protein	691	dCache_1	45	260	216	1.3e-15	dCache_1~MCPsignal~
Lactobacillus ruminis DSM 20403	Methyl-accepting chemotaxis protein	691	dCache_1	104	260	157	2.1e-14	dCache_1~MCPsignal~
Lentisphaeria bacterium isolate RUG53	Serine/threonine-protein kinase	822	dCache_1	612	799	188	1.3e-11	Pkinase~dCache_1~~
	Serine phosphatases	642	dCache_1	131	224	94	0.0015	dCache_1~HAMP~SpoIIE~~
Oribacterium sp. FC2011	Serine phosphatases	705	dCache_1	156	331	176	1.7e-19	dCache_1~HAMP~SpoIIE~
	Methyl-accepting chemotaxis protein	668	dCache_1	91	278	188	2.5e-14	dCache_1~HAMP~MCPsignal~
Oribacterium sp. KHPX15	Methyl-accepting chemotaxis protein	668	dCache_1	91	278	188	2.5e-14	dCache_1~HAMP~MCPsignal~
	Serine phosphatases	704	dCache_1	157	331	175	1.1e-20	dCache_1~HAMP~SpoIIE~
Oribacterium sp. NK2B42	Serine phosphatases	704	dCache_1	156	331	176	5.8e-20	dCache_1~HAMP~SpoIIE~
Oribacterium sp. P6A1	Methyl-accepting chemotaxis protein	668	dCache_1	111	278	168	1.6e-11	dCache_1~HAMP~MCPsignal~
Oribacterium sp. WCC10	Methyl-accepting chemotaxis protein	668	dCache_1	59	279	221	1.1e-12	dCache_1~HAMP~MCPsignal~
Paludibacteraceae bacterium isolate RUG327	Serine phosphatases	703	dCache_1	129	227	99	8.2e-09	dCache_1~SpoIIE~HATPase_c_2~
Prevotella ruminicola D31d	hypothetical protein	288	dCache_1	129	204	76	7.6e-09	dCache_1~
Prevotella sp. isolate RUG248	Serine phosphatases	768	dCache_1	138	288	151	7e-14	dCache_1~HAMP~SpoIIE~HATPase_c_2~
Prevotella sp. isolate RUG306	hypothetical protein	285	dCache_1	134	217	84	2.2e-10	dCache_1~
Prevotella sp. isolate RUG396	hypothetical protein	283	dCache_1	134	214	81	8.6e-08	dCache_1~
Prevotella sp. isolate RUG460	Serine phosphatases	625	dCache_1	127	286	160	2.2e-08	dCache_1~HAMP~SpoIIE~
Prevotella sp. isolate RUG488	hypothetical protein	289	dCache_1	141	205	65	1.2e-05	dCache_1~
Pseudobutyrivibrio ruminis ACV-9	Methyl-accepting chemotaxis protein	683	dCache_1	111	280	170	9.5e-11	dCache_1~HAMP~MCPsignal~
	Methyl-accepting chemotaxis protein	672	dCache_1	126	276	151	1.2e-14	dCache_1~HAMP~MCPsignal~
Pseudobutyrivibrio ruminis AD2017	Methyl-accepting chemotaxis protein	686	dCache_1	114	280	167	6.6e-09	dCache_1~HAMP~MCPsignal~
Pseudobutyrivibrio ruminis CF1b	Methyl-accepting chemotaxis protein	679	dCache_1	116	277	162	1.9e-08	dCache_1~HAMP~MCPsignal~
Pseudobutyrivibrio ruminis DSM 9787	Methyl-accepting chemotaxis protein	672	dCache_1	126	276	151	4.8e-15	dCache_1~HAMP~MCPsignal~
	Methyl-accepting chemotaxis protein	683	dCache_1	114	280	167	1e-09	dCache_1~HAMP~MCPsignal~
Pseudobutyrivibrio ruminis HUN009	Methyl-accepting chemotaxis protein	683	dCache_1	115	280	166	9.7e-10	dCache_1~HAMP~MCPsignal~
	Methyl-accepting chemotaxis protein	673	dCache_1	128	277	150	1.3e-15	dCache_1~HAMP~MCPsignal~
Pseudobutyrivibrio sp. 49	Methyl-accepting chemotaxis protein	679	dCache_1	116	277	162	2.6e-09	dCache_1~HAMP~MCPsignal~
Pseudobutyrivibrio sp. C4	Methyl-accepting chemotaxis protein	673	dCache_1	128	277	150	1.3e-15	dCache_1~HAMP~MCPsignal~
	Methyl-accepting chemotaxis protein	683	dCache_1	110	280	171	1.9e-10	dCache_1~HAMP~MCPsignal~
Pseudobutyrivibrio sp. Isolate RUG503	Methyl-accepting chemotaxis protein	674	dCache_1	68	279	212	4.4e-10	dCache_1~HAMP~MCPsignal~
Pseudobutyrivibrio sp. JW11	Methyl-accepting chemotaxis protein	683	dCache_1	114	280	167	5.5e-10	dCache_1~HAMP~MCPsignal~
Pseudobutyrivibrio sp. LB2011	Methyl-accepting chemotaxis protein	683	dCache_1	110	280	171	2.8e-10	dCache_1~HAMP~MCPsignal~
Pseudobutyrivibrio sp. OR37	Methyl-accepting chemotaxis protein	683	dCache_1	114	280	167	6.3e-07	dCache_1~HAMP~MCPsignal~
Pseudobutyrivibrio sp. UC1225	Methyl-accepting chemotaxis protein	679	dCache_1	116	277	162	2.6e-09	dCache_1~HAMP~MCPsignal~
Pseudobutyrivibrio xylanivorans DSM 10317	Methyl-accepting chemotaxis protein	676	dCache_1	113	274	162	2.6e-09	dCache_1~HAMP~MCPsignal~
Pseudobutyrivibrio xylanivorans DSM 14809	Methyl-accepting chemotaxis protein	679	dCache_1	116	277	162	3.8e-09	dCache_1~HAMP~MCPsignal~
Pseudobutyrivibrio xylanivorans MA3014	Methyl-accepting chemotaxis protein	677	dCache_1	113	277	165	1.2e-06	dCache_1~MCPsignal~~
Ruminiclostridium cellobioparum DSM 1351	Methyl-accepting chemotaxis protein	661	dCache_1	45	263	219	3.9e-21	dCache_1~HAMP~MCPsignal~
Ruminiclostridium sp. isolate RUG179	Sensor histidine kinase	1505	dCache_1	354	516	163	8.3e-12	HisKA_7TM~dCache_1~dCache_1~HisKA~HATPase_c~Response_reg~Hpt~
			dCache_1	760	858	99	5.5e-11
	Sensor histidine kinase	1268	dCache_1	49	277	229	7.6e-16	dCache_1~HisKA~HATPase_c~Response_reg~
	Sensor histidine kinase	818	dCache_1	59	280	222	2.6e-18	dCache_1~HisKA~HATPase_c~Response_reg~
	C-di-GMP-cyclases and diesterases	493	dCache_1	43	272	230	6.9e-14	dCache_1~GGDEF~
	Methyl-accepting chemotaxis protein	661	dCache_1	40	275	236	1.4e-24	dCache_1~HAMP~MCPsignal~
	Sensor histidine kinase	1258	dCache_1	45	275	231	5.9e-12	dCache_1~dCache_1~HisKA~HATPase_c~Response_reg~Hpt~
			dCache_1	491	649	159	6.3e-15
	Sensor histidine kinase	988	dCache_1	88	226	139	3.2e-10	dCache_1~~HAMP~HisKA~HATPase_c~
Ruminobacter amylophilus DSM 1361	Methyl-accepting chemotaxis protein	630	dCache_1	41	265	225	9.4e-19	dCache_1~HAMP~MCPsignal~
Ruminobacter sp. isolate RUG56	Methyl-accepting chemotaxis protein	630	dCache_1	76	265	190	1e-15	dCache_1~HAMP~MCPsignal~
Ruminobacter sp. RM87	Methyl-accepting chemotaxis protein	566	dCache_1	41	265	225	2.3e-19	dCache_1~HAMP~MCPsignal~
Ruminococcaceae bacterium AB4001	Sensor histidine kinase	853	dCache_1	38	264	227	9.7e-21	dCache_1~HisKA~HATPase_c~Response_reg~Hpt~
Ruminococcaceae bacterium FB2012	Sensor histidine kinase	1236	dCache_1	102	259	158	6.2e-15	dCache_1~dCache_1~HisKA~HATPase_c~Response_reg~Hpt~
			dCache_1	423	637	215	4.2e-19
Ruminococcaceae bacterium isolate RUG127	Sensor histidine kinase	890	dCache_1	45	263	219	1.5e-14	dCache_1~HisKA~HATPase_c~Response_reg~Hpt~
Ruminococcaceae bacterium isolate RUG209	Sensor histidine kinase	894	dCache_1	41	263	223	9.1e-16	dCache_1~HisKA~HATPase_c~Response_reg~Hpt~
Ruminococcaceae bacterium R-25	Sensor histidine kinase	851	dCache_1	40	265	226	1.3e-22	dCache_1~HisKA~HATPase_c~Response_reg~Hpt~
Ruminococcaceae bacterium YAD3003	Sensor histidine kinase	852	dCache_1	39	264	226	1.5e-20	dCache_1~HisKA~HATPase_c~Response_reg~Hpt~
Ruminococcaceae bacterium YRB3002	Sensor histidine kinase	1249	dCache_1	38	265	228	9.2e-11	dCache_1~dCache_1~HisKA~HATPase_c~Response_reg~Hpt~
			dCache_1	515	634	120	5.8e-14
Ruminococcus albus 7	Sensor histidine kinase	1233	dCache_1	35	258	224	4.5e-13	dCache_1~dCache_1~HisKA~HATPase_c~Response_reg~
			dCache_1	419	603	185	2.1e-19
Ruminococcus albus 8	Sensor histidine kinase	1233	dCache_1	32	257	226	2.3e-12	dCache_1~dCache_1~HisKA~HATPase_c~Response_reg~
			dCache_1	433	633	201	5.7e-13
Ruminococcus albus AD2013	Sensor histidine kinase	1217	dCache_1	21	243	223	7.5e-13	dCache_1~dCache_1~HisKA~HATPase_c~Response_reg~
			dCache_1	406	618	213	3.9e-20
Ruminococcus albus AR67	Sensor histidine kinase	1229	dCache_1	34	257	224	1.7e-16	dCache_1~dCache_1~HisKA~HATPase_c~Response_reg~
			dCache_1	418	631	214	3.8e-17
Ruminococcus albus KH2T6	Sensor histidine kinase	1229	dCache_1	34	257	224	1.5e-12	dCache_1~dCache_1~HisKA~HATPase_c~Response_reg~
			dCache_1	418	632	215	4.9e-19
Ruminococcus albus SY3	Sensor histidine kinase	1230	dCache_1	34	256	223	2.8e-13	dCache_1~dCache_1~HisKA~HATPase_c~Response_reg~
			dCache_1	419	631	213	2e-20
Ruminococcus sp. HUN007	C-di-GMP-cyclases and diesterases	490	dCache_1	104	249	146	2.7e-11	dCache_1~GGDEF~
	Sensor histidine kinase	927	dCache_1	80	227	148	7.9e-12	dCache_1~HATPase_c~
Ruminococcus sp. NK3A76	Sensor histidine kinase	1245	dCache_1	130	272	143	1.3e-11	dCache_1~dCache_1~HisKA~HATPase_c~Response_reg~
			dCache_1	435	615	181	1.2e-15
Ruminococcus sp. YE71	Sensor histidine kinase	1238	dCache_1	35	258	224	4.6e-13	dCache_1~dCache_1~HisKA~HATPase_c~Response_reg~
			dCache_1	479	626	148	6.7e-17
	C-di-GMP-cyclases and diesterases	510	dCache_1	40	270	231	2.7e-09	dCache_1~GGDEF~
Ruminococcus sp. YE78	Sensor histidine kinase	1238	dCache_1	35	258	224	4.6e-13	dCache_1~dCache_1~HisKA~HATPase_c~Response_reg~
			dCache_1	479	626	148	6.7e-17
	C-di-GMP-cyclases and diesterases	510	dCache_1	40	270	231	2.7e-09	dCache_1~GGDEF~
Saccharofermentans sp. isolate RUG301	Sensor histidine kinase	855	dCache_1	37	265	229	4.8e-22	dCache_1~HisKA~HATPase_c~Response_reg~Hpt~
Saccharofermentans sp. isolate RUG314	Sensor histidine kinase	850	dCache_1	44	265	222	2.6e-22	dCache_1~HisKA~HATPase_c~Response_reg ~Hpt~
Saccharofermentans sp. isolate RUG453	Sensor histidine kinase	872	dCache_1	42	264	223	3.2e-20	dCache_1~HisKA~HATPase_c~Response_reg~Hpt~
Saccharofermentans sp. isolate RUG464	Sensor histidine kinase	876	dCache_1	43	264	222	2.9e-20	dCache_1~HisKA~HATPase_c~Response_reg~Hpt~
Saccharofermentans sp. isolate RUG502	Sensor histidine kinase	872	dCache_1	39	264	226	5e-19	dCache_1~HisKA~HATPase_c~Response_reg~
Saccharofermentans sp. isolate RUG504	Sensor histidine kinase	850	dCache_1	45	264	220	1.2e-20	dCache_1~HisKA~HATPase_c~Response_reg~Hpt~
Saccharofermentans sp. isolate RUG520	Sensor histidine kinase	855	dCache_1	38	264	227	3.2e-21	dCache_1~HisKA~HATPase_c~Response_reg~Hpt~
Saccharofermentans sp. isolate RUG80	Sensor histidine kinase	850	dCache_1	38	264	227	1.4e-21	dCache_1~HisKA~HATPase_c~Response_reg~Hpt~
Schwartzia succinivorans DSM 10502	Methyl-accepting chemotaxis protein	655	dCache_1	50	257	208	2.4e-16	dCache_1~HAMP~MCPsignal~
	Methyl-accepting chemotaxis protein	656	dCache_1	32	259	228	9.9e-22	dCache_1~HAMP~MCPsignal~
Selenomonadaceae bacterium isolate RUG10	Sensor histidine kinase	1072	dCache_1	131	276	146	1.3e-11	dCache_1~HisKA~HATPase_c~Response_reg~
Selenomonadaceae bacterium isolate RUG370	Methyl-accepting chemotaxis protein	656	dCache_1	31	260	230	3.8e-13	dCache_1~HAMP~MCPsignal~
	C-di-GMP-cyclases and diesterases	506	dCache_1	98	265	168	8.8e-11	dCache_1~HD~
	Methyl-accepting chemotaxis protein	658	dCache_1	86	262	177	2.3e-14	dCache_1~HAMP~MCPsignal~
	Sensor histidine kinase	1072	dCache_1	137	277	141	6.4e-13	dCache_1~HisKA~HATPase_c~Response_reg~
Selenomonadaceae bacterium isolate RUG467	C-di-GMP-cyclases and diesterases	506	dCache_1	98	265	168	8.8e-11	dCache_1~HD~
	Sensor histidine kinase	1072	dCache_1	137	277	141	6.4e-13	dCache_1~HisKA~HATPase_c~Response_reg~
	Methyl-accepting chemotaxis protein	658	dCache_1	86	262	177	2.3e-14	dCache_1~HAMP~MCPsignal~
Selenomonas bovis 8-14-1	Methyl-accepting chemotaxis protein	656	dCache_1	89	260	172	8.9e-25	dCache_1~HAMP~MCPsignal~
Selenomonas ruminantium AB3002	Methyl-accepting chemotaxis protein	658	dCache_1	34	261	228	1.3e-11	dCache_1~HAMP~MCPsignal~
Selenomonas ruminantium AC2024	Methyl-accepting chemotaxis protein	659	dCache_1	32	261	230	1.1e-15	dCache_1~HAMP~MCPsignal~
	Sensor histidine kinase	932	dCache_1	131	271	141	5.4e-06	dCache_1~HisKA~HATPase_c~Response_reg~
	Methyl-accepting chemotaxis protein	656	dCache_1	89	260	172	4.4e-22	dCache_1~HAMP~MCPsignal~
Selenomonas ruminantium ATCC 12561	Sensor histidine kinase	931	dCache_1	131	270	140	7.1e-07	dCache_1~HisKA~HATPase_c~Response_reg~
	Methyl-accepting chemotaxis protein	660	dCache_1	32	262	231	1e-16	dCache_1~HAMP~MCPsignal~
	Methyl-accepting chemotaxis protein	656	dCache_1	32	260	229	2.1e-23	dCache_1~HAMP~MCPsignal~
Selenomonas ruminantium C3	Sensor histidine kinase	932	dCache_1	131	271	141	5.4e-06	dCache_1~HisKA~HATPase_c~Response_reg~
	Methyl-accepting chemotaxis protein	663	dCache_1	36	265	230	8.3e-16	dCache_1~HAMP~MCPsignal~
	Methyl-accepting chemotaxis protein	656	dCache_1	92	260	169	6.1e-22	dCache_1~HAMP~MCPsignal~
Selenomonas ruminantium GACV-9	Methyl-accepting chemotaxis protein	656	dCache_1	40	260	221	1.8e-21	dCache_1~HAMP~MCPsignal~
	Methyl-accepting chemotaxis protein	656	dCache_1	89	260	172	1.7e-22	dCache_1~HAMP~MCPsignal~
	Methyl-accepting chemotaxis protein	659	dCache_1	33	262	230	7.7e-14	dCache_1~HAMP~MCPsignal~
Selenomonas ruminantium HD4	Methyl-accepting chemotaxis protein	659	dCache_1	32	262	231	2.3e-17	dCache_1~HAMP~MCPsignal~
	Sensor histidine kinase	933	dCache_1	129	270	142	3.4e-10	dCache_1~HisKA~HATPase_c~Response_reg~Hpt~
	Sensor histidine kinase	978	dCache_1	111	325	215	2.9e-19	dCache_1~HisKA~HATPase_c~Response_reg~Hpt~
Selenomonas ruminantium KH1T6	Methyl-accepting chemotaxis protein	658	dCache_1	35	261	227	7.2e-12	dCache_1~HAMP~MCPsignal~
Selenomonas ruminantium L14	Sensor histidine kinase	932	dCache_1	132	271	140	8.5e-06	dCache_1~HisKA~HATPase_c~Response_reg~
	Methyl-accepting chemotaxis protein	659	dCache_1	32	261	230	1.5e-16	dCache_1~HAMP~MCPsignal~
	Methyl-accepting chemotaxis protein	656	dCache_1	107	260	154	2.4e-22	dCache_1~HAMP~MCPsignal~
Selenomonas ruminantium subsp. lactilytica DSM 2872	Sensor histidine kinase	932	dCache_1	132	271	140	8.3e-06	dCache_1~HisKA~HATPase_c~Response_reg~
	Methyl-accepting chemotaxis protein	656	dCache_1	89	260	172	4.4e-22	dCache_1~HAMP~MCPsignal~
Selenomonas ruminantium subsp. Lactilytica TAM6421	Methyl-accepting chemotaxis protein	659	dCache_1	32	262	231	2.8e-18	dCache_1~HAMP~MCPsignal~
	Methyl-accepting chemotaxis protein	656	dCache_1	105	260	156	2.7e-24	dCache_1~HAMP~MCPsignal~
Selenomonas ruminantium WCT3	Sensor histidine kinase	933	dCache_1	129	270	142	9.6e-09	dCache_1~HisKA~HATPase_c~Response_reg~
	Methyl-accepting chemotaxis protein	656	dCache_1	33	260	228	1.2e-19	dCache_1~HAMP~MCPsignal~
	hypothetical protein	198	dCache_1	32	190	159	1.7e-11	dCache_1~
Selenomonas ruminantium Z108	Methyl-accepting chemotaxis protein	656	dCache_1	33	260	228	2.2e-20	dCache_1~HAMP~MCPsignal~
	Methyl-accepting chemotaxis protein	659	dCache_1	33	262	230	2.9e-14	dCache_1~HAMP~MCPsignal~
Selenomonas ruminantium S137	Methyl-accepting chemotaxis protein	659	dCache_1	32	261	230	5.3e-16	dCache_1~HAMP~MCPsignal~
	Sensor histidine kinase	932	dCache_1	40	271	232	9.6e-09	dCache_1~HisKA~HATPase_c~Response_reg~Hpt~
	Methyl-accepting chemotaxis protein	656	dCache_1	32	260	229	2.7e-23	dCache_1~HAMP~MCPsignal~
Selenomonas sp. AE3005	Sensor histidine kinase	932	dCache_1	40	271	232	2e-08	dCache_1~HisKA~HATPase_c~Response_reg~
	Methyl-accepting chemotaxis protein	656	dCache_1	105	260	156	3.3e-20	dCache_1~HAMP~MCPsignal~
	Methyl-accepting chemotaxis protein	662	dCache_1	35	265	231	1.7e-17	dCache_1~HAMP~MCPsignal~
Selenomonas sp. FC4001	Sensor histidine kinase	932	dCache_1	132	271	140	1.1e-05	dCache_1~HisKA~HATPase_c~Response_reg~
	Methyl-accepting chemotaxis protein	659	dCache_1	32	261	230	7.8e-16	dCache_1~HAMP~MCPsignal~
	Methyl-accepting chemotaxis protein	656	dCache_1	105	260	156	1.5e-22	dCache_1~HAMP~MCPsignal~
Selenomonas sp. ND2010	Methyl-accepting chemotaxis protein	656	dCache_1	33	260	228	3.1e-21	dCache_1~HAMP~MCPsignal~
	Methyl-accepting chemotaxis protein	659	dCache_1	32	262	231	2.1e-17	dCache_1~HAMP~MCPsignal~
	Methyl-accepting chemotaxis protein	656	dCache_1	33	258	226	1.4e-22	dCache_1~HAMP~MCPsignal~
Spirochaetes bacterium isolate RUG33	Methyl-accepting chemotaxis protein	694	dCache_1	40	272	233	5.1e-17	dCache_1~MCPsignal~
	Methyl-accepting chemotaxis protein	574	dCache_1	93	262	170	4.7e-22	dCache_1~MCPsignal~
Spirochaetes bacterium isolate RUG372	Methyl-accepting chemotaxis protein	691	dCache_1	44	267	224	7.3e-23	dCache_1~MCPsignal~
	Methyl-accepting chemotaxis protein	932	dCache_1	448	618	171	3.2e-18	A_deaminase~dCache_1~MCPsignal~
	Methyl-accepting chemotaxis protein	693	dCache_1	41	271	231	7.2e-19	dCache_1~MCPsignal~
Succinimonas amylolytica DSM 2873	Methyl-accepting chemotaxis protein	639	dCache_1	50	262	213	6.5e-12	dCache_1~HAMP~MCPsignal~
	C-di-GMP-cyclases and diesterases	643	dCache_1	142	283	142	1.8e-12	dCache_1~GGDEF~
	C-di-GMP-cyclases and diesterases	959	dCache_1	178	318	141	2.7e-16	dCache_1~GGDEF~Response_reg~GGDEF~
Succinimonas sp. isolate RUG353	Methyl-accepting chemotaxis protein	632	dCache_1	97	267	171	3.6e-08	dCache_1~HAMP~MCPsignal~
	C-di-GMP-cyclases and diesterases	660	dCache_1	128	274	147	1.5e-09	dCache_1~GGDEF~
	C-di-GMP-cyclases and diesterases	916	dCache_1	55	274	220	2.1e-17	dCache_1~GGDEF~Response_reg~GGDEF~
	Methyl-accepting chemotaxis protein	637	dCache_1	50	262	213	8.6e-11	dCache_1~HAMP~MCPsignal~
Succinivibrionaceae bacterium isolate RUG285	Methyl-accepting chemotaxis protein	678	dCache_1	91	269	179	1.7e-08	dCache_1~HAMP~MCPsignal~
	Sensor histidine kinase	933	dCache_1	69	282	214	6.6e-17	dCache_1~HisKA~HATPase_c~Response_reg~Hpt~
	C-di-GMP-cyclases and diesterases	633	dCache_1	105	283	179	4.6e-19	dCache_1~GGDEF~
Succinivibrionaceae bacterium isolate RUG356	Methyl-accepting chemotaxis protein	637	dCache_1	99	230	132	1e-12	dCache_1~HAMP~MCPsignal~
	C-di-GMP-cyclases and diesterases	634	dCache_1	103	283	181	5.5e-21	dCache_1~GGDEF~
	C-di-GMP-cyclases and diesterases	931	dCache_1	57	274	218	7.2e-17	dCache_1~GGDEF~Response_reg~GGDEF~
Succinivibrionaceae bacterium isolate RUG469	Methyl-accepting chemotaxis protein	656	dCache_1	57	281	225	5.6e-15	dCache_1~HAMP~MCPsignal~
Succinivibrionaceae bacterium isolate RUG475	Methyl-accepting chemotaxis protein	637	dCache_1	101	268	168	9.9e-13	dCache_1~HAMP~MCPsignal~
	C-di-GMP-cyclases and diesterases	931	dCache_1	57	274	218	7.8e-17	dCache_1~GGDEF~Response_reg~GGDEF~
	C-di-GMP-cyclases and diesterases	634	dCache_1	103	283	181	8.4e-20	dCache_1~GGDEF~
	Methyl-accepting chemotaxis protein	634	dCache_1	50	262	213	1.4e-09	dCache_1~HAMP~MCPsignal~
Succinivibrionaceae bacterium isolate RUG84	hypothetical protein	347	dCache_1	105	283	179	2.2e-21	dCache_1~
	Methyl-accepting chemotaxis protein	638	dCache_1	45	268	224	4.7e-11	dCache_1~HAMP~MCPsignal~
	Methyl-accepting chemotaxis protein	634	dCache_1	50	261	212	5.6e-09	dCache_1~HAMP~MCPsignal~
	Sensor histidine kinase	944	dCache_1	71	299	229	3e-16	dCache_1~HisKA~HATPase_c~Response_reg~Hpt~
	C-di-GMP-cyclases and diesterases	643	dCache_1	105	293	189	1.5e-15	dCache_1~GGDEF~
Treponema bryantii B25	Methyl-accepting chemotaxis protein	696	dCache_1	36	263	228	1.6e-20	dCache_1~HAMP~MCPsignal~
Treponema bryantii NK4A124	Methyl-accepting chemotaxis protein	616	dCache_1	73	277	205	1.1e-15	dCache_1~MCPsignal~
Treponema saccharophilum DSM 2985	Methyl-accepting chemotaxis protein	586	dCache_1	131	274	144	3.5e-18	dCache_1~MCPsignal~
	Methyl-accepting chemotaxis protein	581	dCache_1	119	271	153	1.7e-16	dCache_1~MCPsignal~
	Methyl-accepting chemotaxis protein	690	dCache_1	36	262	227	4e-15	dCache_1~HAMP~MCPsignal~
	Methyl-accepting chemotaxis protein	688	dCache_1	90	261	172	6.7e-20	dCache_1~HAMP~MCPsignal~
	Methyl-accepting chemotaxis protein	691	dCache_1	105	253	149	1.7e-16	dCache_1~HAMP~MCPsignal~
	Methyl-accepting chemotaxis protein	695	dCache_1	77	269	193	5.1e-19	dCache_1~HAMP~MCPsignal~
	Methyl-accepting chemotaxis protein	692	dCache_1	32	266	235	6e-20	dCache_1~HAMP~MCPsignal~
Treponema sp. C6A8	Methyl-accepting chemotaxis protein	689	dCache_1	34	263	230	6.8e-18	dCache_1~HAMP~MCPsignal~
Treponema sp. isolate RUG153	Methyl-accepting chemotaxis protein	692	dCache_1	32	267	236	3e-23	dCache_1~HAMP~MCPsignal~
Treponema sp. isolate RUG203	Methyl-accepting chemotaxis protein	690	dCache_1	94	262	169	7.4e-13	dCache_1~HAMP~MCPsignal~
	Methyl-accepting chemotaxis protein	692	dCache_1	32	267	236	2.6e-17	dCache_1~HAMP~MCPsignal~
	Methyl-accepting chemotaxis protein	645	dCache_1	39	268	230	2.6e-13	dCache_1~MCPsignal~
Treponema sp. isolate RUG219	Methyl-accepting chemotaxis protein	695	dCache_1	131	272	142	3.2e-17	dCache_1~MCPsignal~
	Methyl-accepting chemotaxis protein	933	dCache_1	451	619	169	1e-16	A_deaminase~dCache_1~MCPsignal~
	Methyl-accepting chemotaxis protein	692	dCache_1	33	266	234	3e-17	dCache_1~HAMP~MCPsignal~
Treponema sp. isolate RUG220	Methyl-accepting chemotaxis protein	595	dCache_1	104	276	173	7.4e-15	dCache_1~MCPsignal~
Treponema sp. isolate RUG256	Methyl-accepting chemotaxis protein	691	dCache_1	79	265	187	9.2e-14	dCache_1~HAMP~MCPsignal~
Treponema sp. isolate RUG258	Methyl-accepting chemotaxis protein	690	dCache_1	39	263	225	6.1e-18	dCache_1~HAMP~MCPsignal~
Treponema sp. isolate RUG261	Methyl-accepting chemotaxis protein	690	dCache_1	36	263	228	8.1e-20	dCache_1~HAMP~MCPsignal~
Treponema sp. isolate RUG3	Methyl-accepting chemotaxis protein	692	dCache_1	85	243	159	1.1e-17	dCache_1~HAMP~MCPsignal~
Treponema sp. isolate RUG405	C-di-GMP-cyclases and diesterases	618	dCache_1	53	280	228	1e-19	dCache_1~GGDEF~
Treponema sp. isolate RUG62	Methyl-accepting chemotaxis protein	600	dCache_1	133	272	140	6.8e-13	dCache_1~MCPsignal~
	Methyl-accepting chemotaxis protein	699	dCache_1	132	272	141	8.1e-17	dCache_1~MCPsignal~
	Methyl-accepting chemotaxis protein	692	dCache_1	33	266	234	1.9e-16	dCache_1~HAMP~MCPsignal~
Treponema sp. JC4	C-di-GMP-cyclases and diesterases	619	dCache_1	117	279	163	2.3e-11	dCache_1~GGDEF~
	Methyl-accepting chemotaxis protein	690	dCache_1	35	236	202	1.3e-17	dCache_1~HAMP~MCPsignal~
	Methyl-accepting chemotaxis protein	690	dCache_1	34	264	231	1.6e-15	dCache_1~HAMP~MCPsignal~
Wolinella succinogenes DSM 1740	Methyl-accepting chemotaxis protein	629	dCache_1	76	259	184	1.9e-21	dCache_1~HAMP~MCPsignal~
